# Supplementary material
Source: publisher figshare collection journal article supplement (https://diabetesjournals.figshare.com/articles/dataset/_/24156732)

## Supplementary material

### Reduced insulin clearance differently relates to increased liver lipid content and worse glycemic control in recent-onset type 2 and type 1 diabetes mellitus

Zaharia et al.

**Supplementary Table 1.** Antihypertensive, lipid-lowering and glucose-lowering medication of the study population comprising glucose tolerant people (CON) and people with type 1 (T1D) or type diabetes (T2D).

| Variable                       | CON       | T1D       | T2D       |
|--------------------------------|-----------|-----------|-----------|
| <b>Antihypertensive drugs</b>  | 15 (0.7%) | 26 (3%)   | 237 (16%) |
| <b>Lipid-lowering drugs</b>    | 2 (9%)    | 8 (9%)    | 85 (48%)  |
| <b>Glucose-lowering drugs</b>  |           |           |           |
| <b>Insulin</b>                 | 0 (0%)    | 261 (86%) | 35 (6%)   |
| <b>Metformin</b>               | 0 (0%)    | 32 (10%)  | 264 (54%) |
| <b>Sulfonylureas</b>           | 0 (0%)    | 2 (0.6%)  | 13 (3%)   |
| <b>GLP-1 receptor agonists</b> | 0 (0%)    | 0 (0%)    | 0 (0%)    |
| <b>DPP4 inhibitors</b>         | 0 (0%)    | 1(0.3%)   | 30 (6%)   |
| <b>SGLT2 inhibitors</b>        | 0 (0%)    | 0 (0%)    | 1 (0.2%)  |

Data is given as n (%). Percentages refer to the number of participants with recorded data from each group.

**Abbreviations:** DPP4, Dipeptidyl-peptidase 4; GLP-1, Glucagon-like peptide-1; SGLT2, Sodium-glucose co-transporter 2;

## Supplementary Figure 1. Correlations between different measures of insulin clearance

Heat map showing the correlation between insulin clearance derived from hyperinsulinemic-euglycemic clamp ( $IC_{CLAMP}$ ), insulin clearance derived from intravenous glucose tolerance test ( $IC_{IVGTT}$ ) and insulin clearance derived from mixed meal test ( $IC_{MMT}$ ) in the study cohort (A) as well as group-specific for persons without diabetes (CON) (B), type 1 diabetes (T1D) (C) and type 2 diabetes (T2D) (D).

The scale 0-1 reflects the strength of the correlation (correlation coefficient  $r$ ).

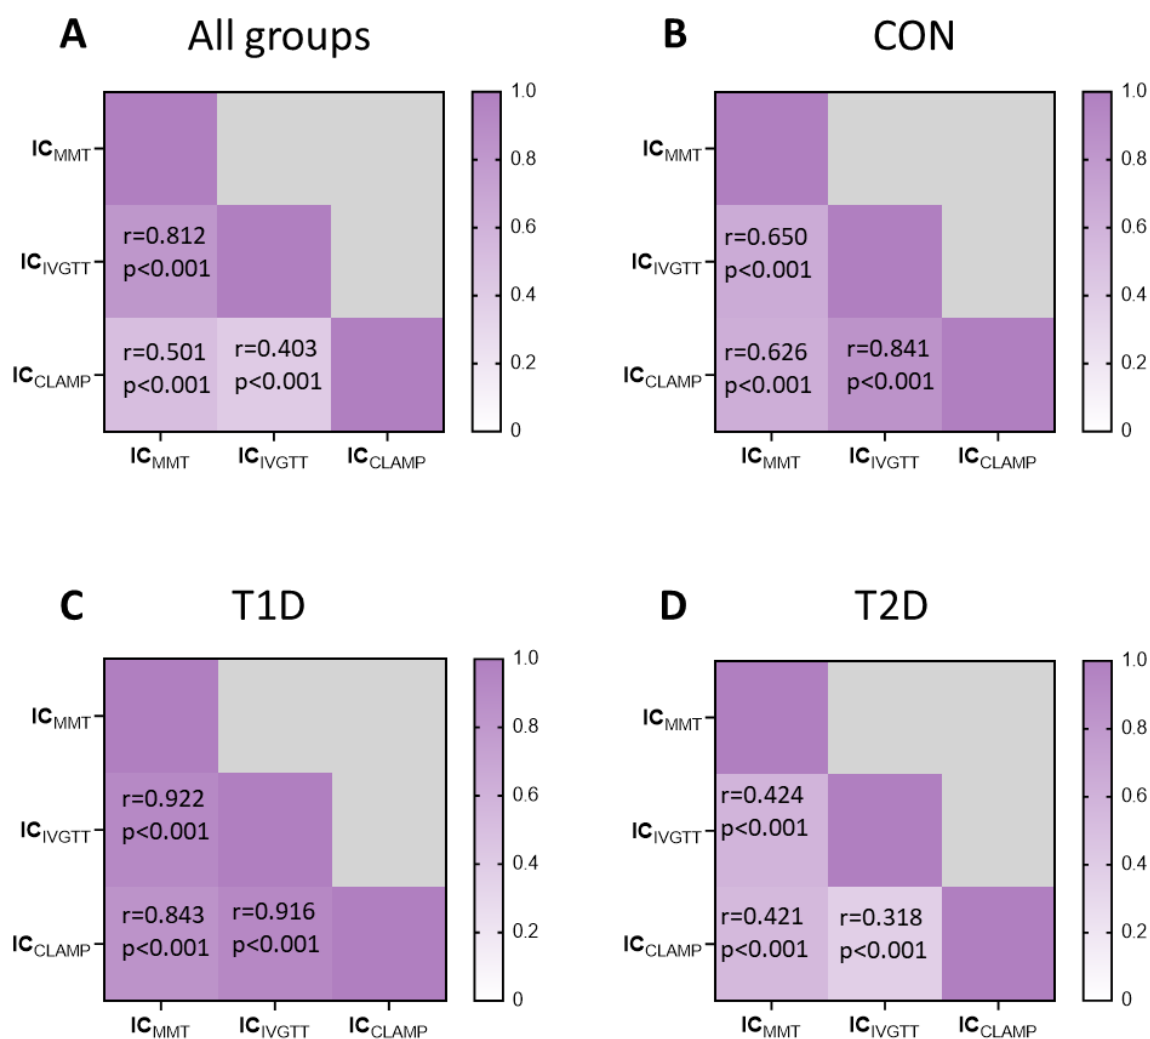

## Supplementary Figure 2. Correlations between different measures of insulin clearance stratified by diabetes type and the presence of steatosis

Heat map showing the correlation between insulin clearance derived from hyperinsulinemic-euglycemic clamp ( $IC_{CLAMP}$ ), insulin clearance derived from intravenous glucose tolerance test ( $IC_{IVGTT}$ ) and insulin clearance derived from mixed meal test ( $IC_{MMT}$ ) for persons without diabetes (CON) (A, B), type 1 diabetes (T1D) (C, D) and type 2 diabetes (T2D) (E, F) with and without steatosis. The scale 0-1 reflects the strength of the correlation (correlation coefficient  $r$ ).

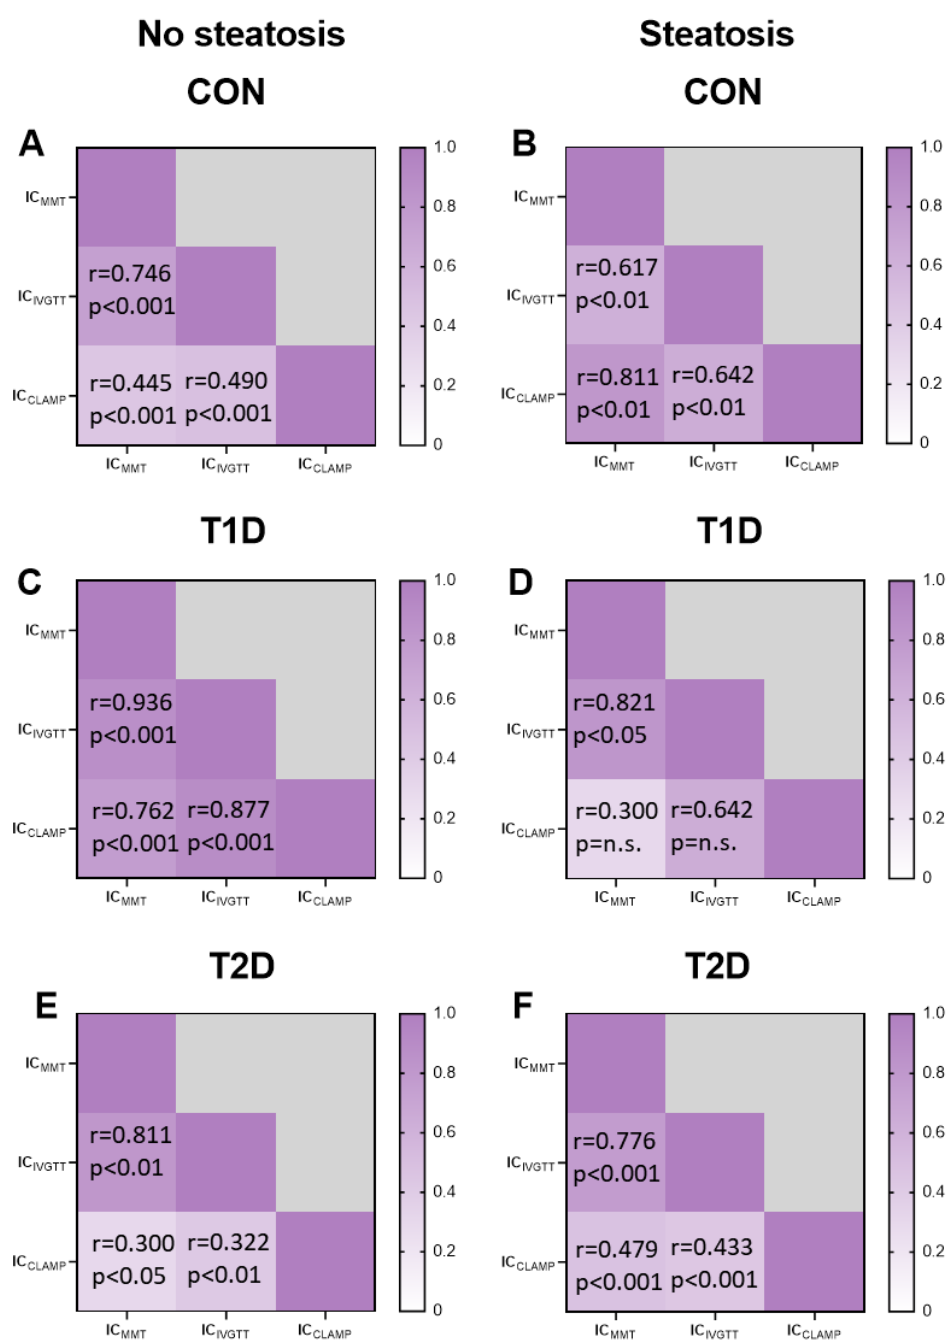

### Supplementary Figure 3. Correlation between insulin clearance and metabolic parameters

Associations between insulin clearance derived from hyperinsulinemic-euglycemic clamp test ( $IC_{CLAMP}$ ) insulin clearance derived from intravenous glucose tolerance test ( $IC_{IVGTT}$ ) and insulin clearance derived from mixed meal test ( $IC_{MMT}$ ) with metabolic parameters [hepatocellular lipids (HCL), (A, D, G); glycemic control (HbA1c) (B, E, H); whole-body insulin sensitivity (M-value) (D, F, I)] in persons without diabetes (CON), type 1 diabetes (T1D) and type 2 diabetes (T2D). Statistically significant correlations are depicted with linear regression lines and the respective correlation coefficients ( $r$ ).

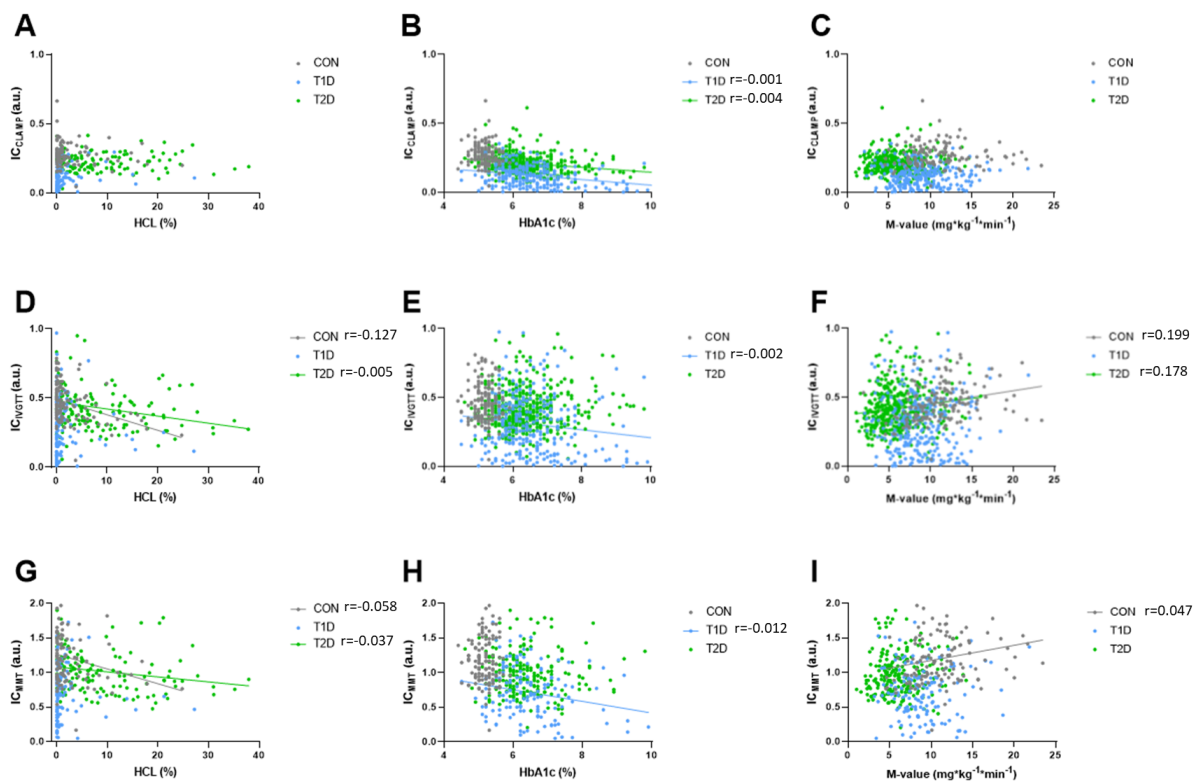

Supplement: Supplementary file 2 [file 1]
