# Supplementary material
Source: publisher figshare collection journal article supplement (https://diabetesjournals.figshare.com/articles/dataset/_/24156732)
Supplement: Supplementary file 1 [file 1]

## **Contributors GDS Group**

The GDS Group consists of M. Roden (speaker), H. Al-Hasani, B. Belgardt, G. Bönhof, G. Geerling, C. Herder, A. Icks, K. Jandeleit-Dahm, J. Kotzka, O. Kuß, E. Lammert, W. Rathmann, S. Schlesinger, V. Schrauwen-Hinderling, J. Szendroedi, S. Trenkamp, R. Wagner and their co-workers who contributed to the design and conduct of the GDS.

Michael Roden

Hadi Al-Hasani

Bengt Belgardt

Gidon Josia Bönhof

Gerd Geerling

Christian Herder

Andrea Icks

Karin Jandeleit-Dahm

Jörg Kotzka

Oliver Kuß

Eckhard Lammert

Wolfgang Rathmann

Sabrina Schlesinger

Vera Schrauwen-Hinderling

Julia Szendroedi

Sandra Trenkamp

Robert Wagner
